# Supplementary material
Source: PubMed Central journal article supplement (PMC7158995)
Supplement: mmc1.pdf [file mmc1.pdf]

# THE LANCET

## Digital Health

### Supplementary appendix

This appendix formed part of the original submission. We post it as supplied by the authors.

Supplement to: Leung GM, Leung K. Crowdsourcing data to mitigate epidemics. *Lancet Digital Health* 2020; published online Feb 20. [https://doi.org/10.1016/S2589-7500\(20\)30055-8](https://doi.org/10.1016/S2589-7500(20)30055-8).

## Appendix

**Table. Summary of publicly available COVID-19 patient line list data**

| Source                                                                                                                                                                                                                                                                                                                                                                                                                                                                                           | Available data elements                                                                                                                                      | Parameters that can be estimated                                                 |
|--------------------------------------------------------------------------------------------------------------------------------------------------------------------------------------------------------------------------------------------------------------------------------------------------------------------------------------------------------------------------------------------------------------------------------------------------------------------------------------------------|--------------------------------------------------------------------------------------------------------------------------------------------------------------|----------------------------------------------------------------------------------|
| <b>Data clearing houses or secondary repositories</b>                                                                                                                                                                                                                                                                                                                                                                                                                                            |                                                                                                                                                              |                                                                                  |
| Data Platform of <i>Shanghai Observer</i> – collated from multiple sources including official websites of various Health Commissions, social media (Weibo and WeChat) and news (CCTV, Xinhua and People’s Daily etc.)<br><a href="http://data.shobserver.com/www/index.html#/home">http://data.shobserver.com/www/index.html#/home</a>                                                                                                                                                           | Age, sex, date of symptom onset, date of first medical consultation or admission, date of discharge, date of death, travel history, links to confirmed cases | Incubation period, time between symptom onset and admission, reproductive number |
| Laboratory for the Modeling of Biological and Socio-technical Systems (MOBS) – collated from multiple sources including official websites of Health Commission, social media (Weibo and WeChat)<br><a href="https://docs.google.com/spreadsheets/d/e/2PACX-1vQU0SIALScXx8VXDX7yKNKWWPKE1YjFIWc6VTEVSN45CklWWf-uWmprQlyLtoPDA18tX9cFDr-aQ9S6/pubhtml">https://docs.google.com/spreadsheets/d/e/2PACX-1vQU0SIALScXx8VXDX7yKNKWWPKE1YjFIWc6VTEVSN45CklWWf-uWmprQlyLtoPDA18tX9cFDr-aQ9S6/pubhtml</a> | Age, sex, date of symptom onset, date of first medical consultation or admission, date of discharge, date of death, travel history, links to confirmed cases | Incubation period, time between symptom onset and admission, reproductive number |
| MIDAS COVID-19 Repository<br><a href="https://midasnetwork.us/midas-covid-19-repository-now-public/">https://midasnetwork.us/midas-covid-19-repository-now-public/</a>                                                                                                                                                                                                                                                                                                                           | Age, sex, date of symptom onset, date of report                                                                                                              | Incubation period, time between symptom onset and admission, reproductive number |

|                                                                                                                                                                                                                                                                                                                                                                                                                                                                                                                                                                                                      |                                                                                                                                                                                                                                                       |                                                                                                                                  |
|------------------------------------------------------------------------------------------------------------------------------------------------------------------------------------------------------------------------------------------------------------------------------------------------------------------------------------------------------------------------------------------------------------------------------------------------------------------------------------------------------------------------------------------------------------------------------------------------------|-------------------------------------------------------------------------------------------------------------------------------------------------------------------------------------------------------------------------------------------------------|----------------------------------------------------------------------------------------------------------------------------------|
| (Data collated by Imperial College, London, National Institutes of Health Fogarty International Center and University of Oxford and other institutes)                                                                                                                                                                                                                                                                                                                                                                                                                                                |                                                                                                                                                                                                                                                       |                                                                                                                                  |
| <b>Official websites or social media accounts of various Health Commissions at the provincial and municipal levels in mainland China*</b>                                                                                                                                                                                                                                                                                                                                                                                                                                                            |                                                                                                                                                                                                                                                       |                                                                                                                                  |
| Beijing<br><a href="https://www.weibo.com/beijingshiweishengju">https://www.weibo.com/beijingshiweishengju</a><br>(information available on Weibo posts between Jan 17, and Jan 30, 2020)                                                                                                                                                                                                                                                                                                                                                                                                            | Age, sex, date of symptom onset, date of first medical consultation, no. of confirmed cases with travel history each day, date of confirmation                                                                                                        | Time between onset and first medical consultation, reproductive number                                                           |
| Shanghai (detailed information only available for some of the confirmed cases)<br><a href="http://wsjkw.sh.gov.cn/">http://wsjkw.sh.gov.cn/</a><br><a href="https://www.weibo.com/shanghaicity">https://www.weibo.com/shanghaicity</a>                                                                                                                                                                                                                                                                                                                                                               | Age, sex, travel history, links to confirmed cases, first symptoms, date of symptom onset, date of confirmation                                                                                                                                       | Reproductive number                                                                                                              |
| Shenzhen, Zhuhai, Guangdong Province<br><a href="http://wjw.sz.gov.cn/">http://wjw.sz.gov.cn/</a><br><a href="http://wsjkj.zhuhai.gov.cn/">http://wsjkj.zhuhai.gov.cn/</a><br><a href="https://h5-health.tengmed.com/h5/feiyang?cityCode=440300&amp;channel=gzh&amp;sessionId=1581671158&amp;scene=0&amp;scene=126&amp;clicktime=1581671171">https://h5-health.tengmed.com/h5/feiyang?cityCode=440300&amp;channel=gzh&amp;sessionId=1581671158&amp;scene=0&amp;scene=126&amp;clicktime=1581671171</a>                                                                                                | Age, sex, travel history (with details), links to confirmed cases (with details), residential district, possible date of exposure (for some cases), first symptoms, date of symptom onset, date of admission, date of confirmation, date of discharge | Incubation period, serial interval (from infector-infectee pairs), time between symptom onset and admission, reproductive number |
| Wenzhou, Lishui, Taizhou, Ningbo, Hangzhou, Shaoxing, Quzhou, Zhejiang Province<br><a href="http://wjw.wenzhou.gov.cn/">http://wjw.wenzhou.gov.cn/</a><br><a href="http://wsjsw.lishui.gov.cn/">http://wsjsw.lishui.gov.cn/</a><br><a href="http://wsjkw.zjtz.gov.cn/index.php">http://wsjkw.zjtz.gov.cn/index.php</a><br><a href="http://wjw.ningbo.gov.cn/">http://wjw.ningbo.gov.cn/</a><br><a href="http://wsjkw.hangzhou.gov.cn/">http://wsjkw.hangzhou.gov.cn/</a><br><a href="http://sxws.sx.gov.cn/">http://sxws.sx.gov.cn/</a><br><a href="http://wjw.qz.gov.cn/">http://wjw.qz.gov.cn/</a> | Age, sex, travel history (with details for Lishui), links to confirmed cases, residential district, first symptoms, date of symptom onset, date of confirmation, date of discharge (for Lishui)                                                       | Incubation period (Lishui), time between symptom onset and admission (Lishui), reproductive number                               |

|                                                                                                                                                                                                                                                                                                                                                                                                                                                                                                                                   |                                                                                                                                                                                                                                                              |                                                                                                                                         |
|-----------------------------------------------------------------------------------------------------------------------------------------------------------------------------------------------------------------------------------------------------------------------------------------------------------------------------------------------------------------------------------------------------------------------------------------------------------------------------------------------------------------------------------|--------------------------------------------------------------------------------------------------------------------------------------------------------------------------------------------------------------------------------------------------------------|-----------------------------------------------------------------------------------------------------------------------------------------|
| <p>Taizhou, Nantong, Huai'an, Suqian, Xuzhou, Zhenjiang, Jiangsu Province<br/> <a href="http://wjw.taizhou.gov.cn/">http://wjw.taizhou.gov.cn/</a><br/> <a href="http://wjw.nantong.gov.cn/">http://wjw.nantong.gov.cn/</a><br/> <a href="http://wjw.huaiian.gov.cn/">http://wjw.huaiian.gov.cn/</a><br/> <a href="http://wsj.suqian.gov.cn/">http://wsj.suqian.gov.cn/</a><br/> <a href="http://ws.xz.gov.cn/wsj/">http://ws.xz.gov.cn/wsj/</a><br/> <a href="http://wjw.zhenjiang.gov.cn/">http://wjw.zhenjiang.gov.cn/</a></p> | <p>Age, sex, travel history (with details for Zhenjiang), links to confirmed cases (with details for Zhenjiang), residential district, first symptoms, date of symptom onset, date of confirmation, date of admission</p>                                    | <p>Time between symptom onset and admission, reproductive number</p>                                                                    |
| <p><b>Official websites of health authorities outside mainland China*</b></p>                                                                                                                                                                                                                                                                                                                                                                                                                                                     |                                                                                                                                                                                                                                                              |                                                                                                                                         |
| <p>Singapore<br/> <a href="https://www.moh.gov.sg/covid-19">https://www.moh.gov.sg/covid-19</a></p>                                                                                                                                                                                                                                                                                                                                                                                                                               | <p>Age, sex, travel history (with details), links to confirmed cases (with details), residential district, possible date of exposure (for some cases), first symptoms, date of symptom onset, date of admission, date of confirmation</p>                    | <p>Incubation period, serial interval (from infector-infectee pairs), time between symptom onset and admission, reproductive number</p> |
| <p>Hong Kong SAR, China<br/> <a href="https://www.chp.gov.hk/en/index.html">https://www.chp.gov.hk/en/index.html</a></p>                                                                                                                                                                                                                                                                                                                                                                                                          | <p>Age, sex, travel history (with details), links to confirmed cases (with details), residential district, possible date of exposure (for some cases), first symptoms, date of symptom onset, date of admission, date of confirmation, date of discharge</p> | <p>Incubation period, serial interval (from infector-infectee pairs), time between symptom onset and admission, reproductive number</p> |
| <p>Macau SAR, China<br/> <a href="https://www.ssm.gov.mo/portal/">https://www.ssm.gov.mo/portal/</a></p>                                                                                                                                                                                                                                                                                                                                                                                                                          | <p>Age, sex, travel history (with details), links to confirmed cases (with details), residential district, possible date of exposure (for some cases), first symptoms, date of symptom onset, date of admission, date of confirmation, date of discharge</p> | <p>Incubation period, serial interval (from infector-infectee pairs), time between symptom onset and admission, reproductive number</p> |
| <p>South Korea<br/> <a href="http://www.cdc.go.kr/cdc_eng/">http://www.cdc.go.kr/cdc_eng/</a></p>                                                                                                                                                                                                                                                                                                                                                                                                                                 | <p>Age, sex, travel history, links to confirmed cases, date of confirmation</p>                                                                                                                                                                              | <p>Reproductive number</p>                                                                                                              |

|                                                                                                                                 |                                                                                                |                     |
|---------------------------------------------------------------------------------------------------------------------------------|------------------------------------------------------------------------------------------------|---------------------|
| (Information can be collated from press releases)                                                                               |                                                                                                |                     |
| Vietnam<br><a href="https://ncov.moh.gov.vn/">https://ncov.moh.gov.vn/</a><br>(Information can be collated from press releases) | Age, sex, travel history, links to confirmed cases, residential district, date of confirmation | Reproductive number |

\* Cities in a few provinces (e.g. Sichuan, Shandong, Anhui etc. in addition to the provinces shown in the list) provide detailed information of confirmed cases on the official websites of Health Commission.
